# Supplementary material for: Reproductive fitness ofDrosophilais maximised by optimal developmental temperature
Source: Oxford University Press journal article supplement (doi:10.1242/jeb.202184), 2019-01-01
Supplement: jeb202184supp.pdf [file jeb202184supp.pdf]

**A**

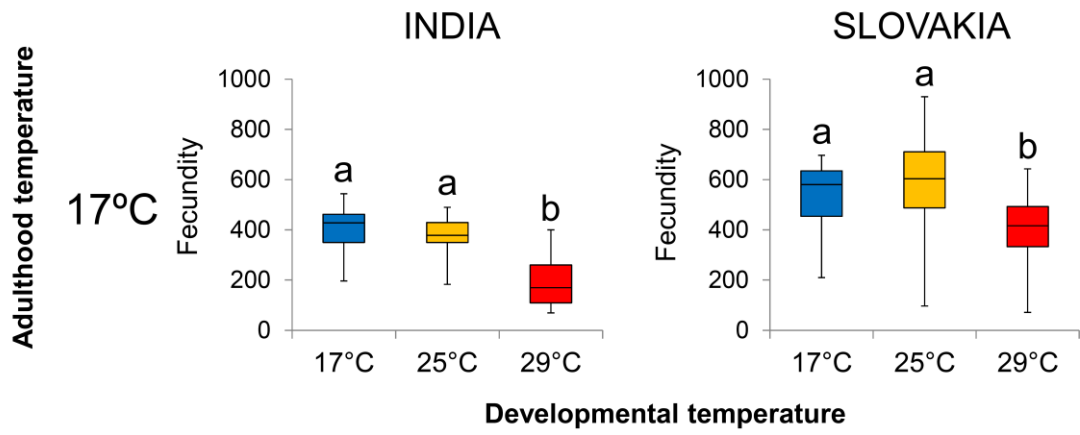

**B**

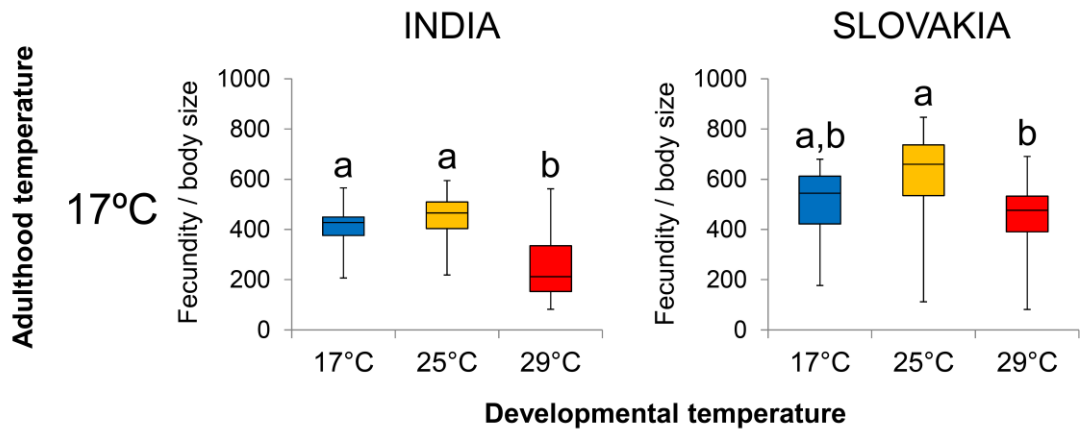

**C**

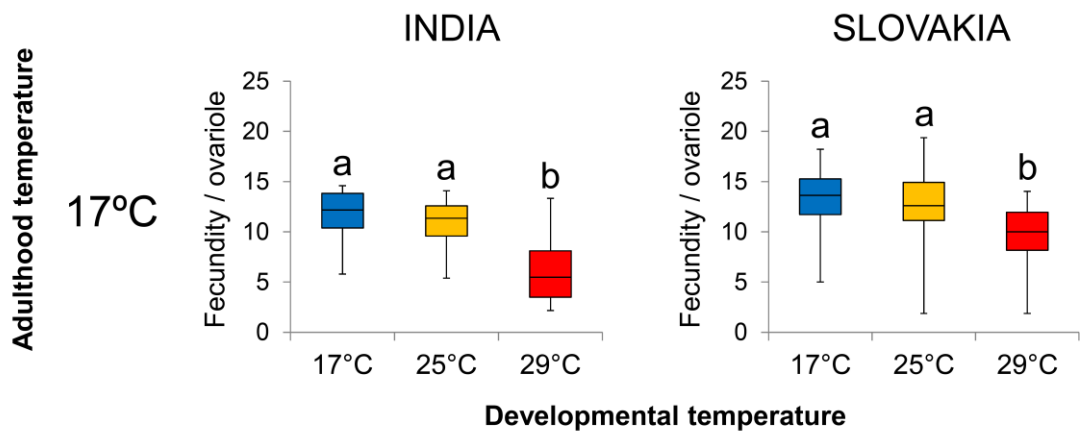

**Figure S1.** Effect of developmental temperature on early fecundity (cumulative number of eggs during the first twenty days after eclosion) (**A**), relative fecundity (cumulative number of eggs laid during the first twenty days after eclosion per unit body size (thorax length<sup>3</sup>)) (**B**), and early fecundity per ovariole (cumulative number of eggs laid during the first twenty days after eclosion per ovariole) at 17°C (**C**). Data for each population, adulthood temperature and trait were compared by one-way ANOVA followed by Tukey's HSD test ( $\alpha = 0.05$ ). Groups with the same letters are not significantly different from each other. Box plots display minimum, first quartile, median, third quartile, and maximum value. For statistical analyses see Table S1, S2.

**A**

**Adulthood temperature**

17°C

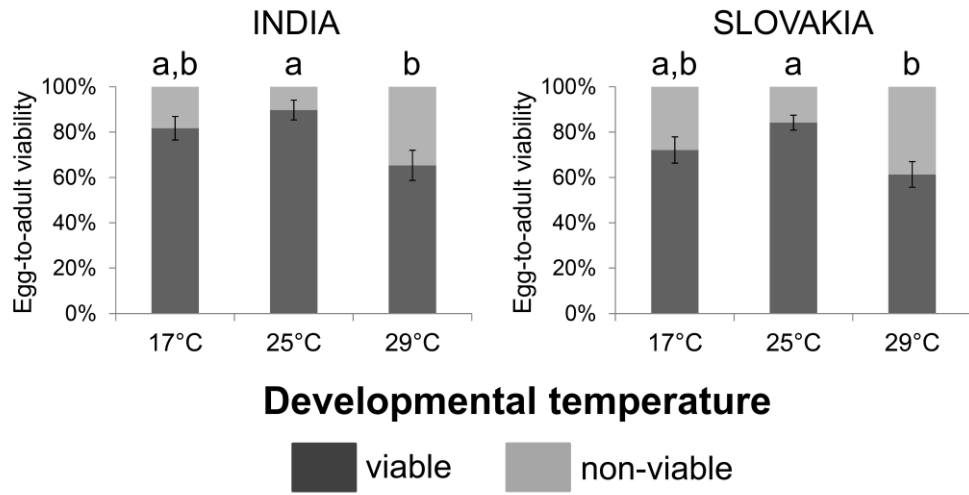

**B**

**Adulthood temperature**

25°C

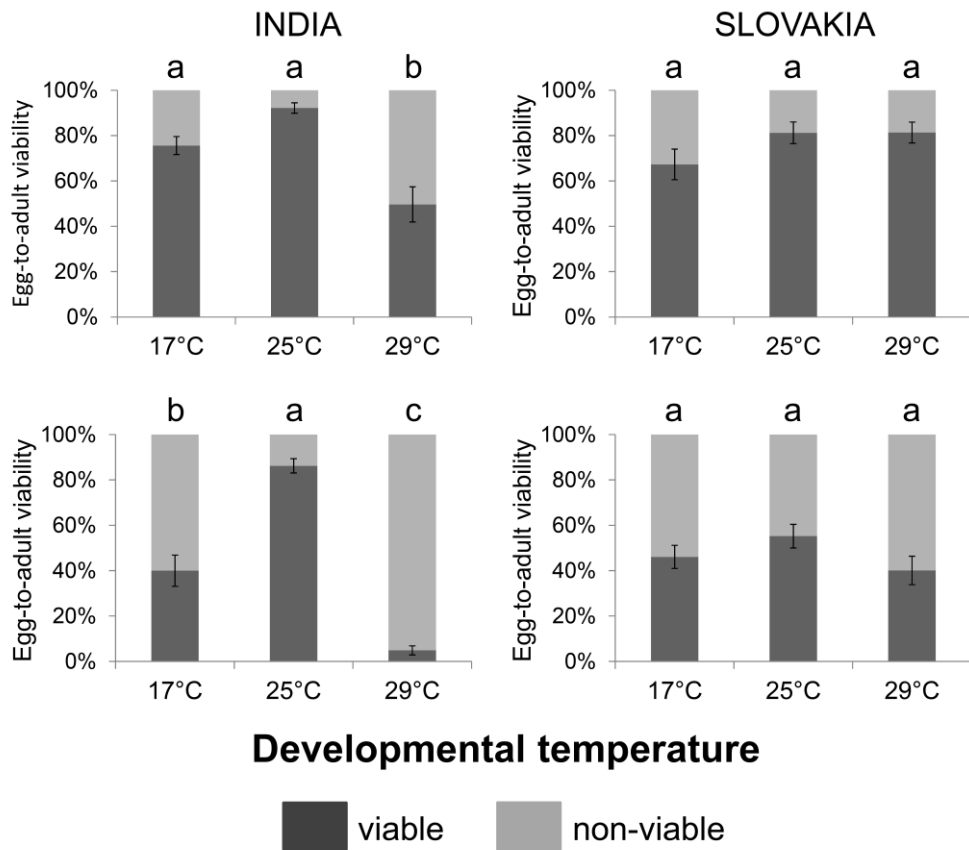

**Figure S2.** (A) Effect of developmental temperature of parents on the egg-to-adult viability at the day 20 at 17°C. (B) Effect of developmental temperature of parents on the egg-to-adult viability at the day 5 at 25°C and 29°C. Data for each population were compared by one-way ANOVA followed by Tukey's HSD test ( $\alpha = 0.05$ ). Groups with the same letters are not significantly different from each other. Error bars represent s.e.m. For further statistical analyses see Table S3.

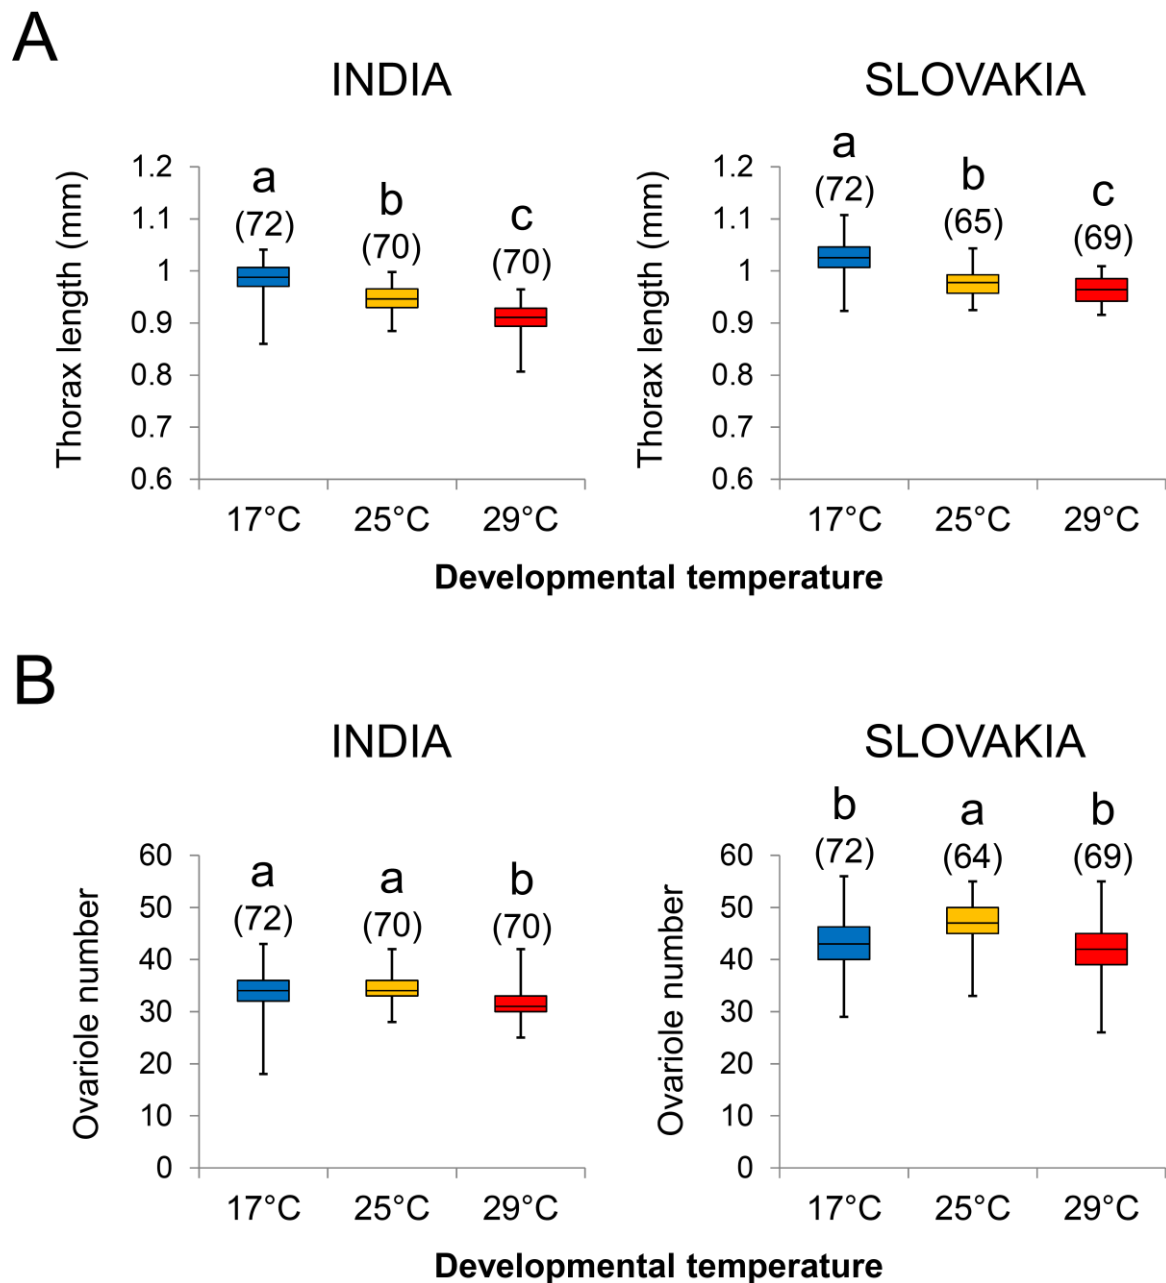

**Figure S3.** Effect of developmental temperature on thorax length (A) and ovariole number (B). Sample size is reported in parenthesis. Data for each trait and population were compared by one-way ANOVA followed by Tukey's HSD test ( $\alpha = 0.05$ ). Groups with the same letters are not significantly different from each other. Box plots display minimum, first quartile, median, third quartile, and maximum value.

**Table S1.** Two-way analysis of variance (ANOVA) testing the effects of population and developmental temperature, and their interactions on early fecundity (the mean cumulative number of eggs laid per female during a given period) at three adulthood temperatures. *df* - degrees of freedom; SSQ - the sum of squares for each source of variation.

| <b>Adulthood temperature</b>  | <b>Source of variation</b>             | <b><i>df</i></b> | <b>SSQ</b> | <b><i>F</i>-ratio</b> | <b><i>P</i>-value</b> |
|-------------------------------|----------------------------------------|------------------|------------|-----------------------|-----------------------|
| <b>17°C<br/>(ten days)</b>    | Population                             | 1                | 375185.1   | 120.58                | < 0.0001              |
|                               | Developmental temperature              | 2                | 286365.6   | 46.02                 | < 0.0001              |
|                               | Population × Developmental temperature | 2                | 103373.7   | 16.61                 | < 0.0001              |
|                               | Error                                  | 135              | 420048.3   | -                     | -                     |
| <b>17°C<br/>(twenty days)</b> | Population                             | 1                | 1225051.9  | 72.80                 | < 0.0001              |
|                               | Developmental temperature              | 2                | 1006284.7  | 29.90                 | < 0.0001              |
|                               | Population × Developmental temperature | 2                | 42492.2    | 1.26                  | 0.286                 |
|                               | Error                                  | 135              | 2271642.8  | -                     | -                     |
| <b>25°C<br/>(ten days)</b>    | Population                             | 1                | 1176651.3  | 51.43                 | < 0.0001              |
|                               | Developmental temperature              | 2                | 364547.7   | 7.97                  | 0.0005                |
|                               | Population × Developmental temperature | 2                | 15410.1    | 0.34                  | 0.715                 |
|                               | Error                                  | 132              | 3020094.9  | -                     | -                     |
| <b>29°C<br/>(ten days)</b>    | Population                             | 1                | 1703353.4  | 44.07                 | < 0.0001              |
|                               | Developmental temperature              | 2                | 1371897.1  | 17.75                 | < 0.0001              |
|                               | Population × Developmental temperature | 2                | 106543.2   | 1.38                  | 0.256                 |
|                               | Error                                  | 133              | 5140659.4  | -                     | -                     |

**Table S2.** Mean cumulative number of eggs ( $\pm$  s.e.m) laid by individual females during a given period, mean cumulative number of eggs ( $\pm$  SEM) per unit body size (thorax length<sup>3</sup>), and mean cumulative number of eggs ( $\pm$  s.e.m) per ovariole at three adulthood temperatures. Data for each population, adulthood temperature and trait were compared by one-way ANOVA followed by Tukey's HSD test ( $\alpha = 0.05$ ). Groups with the same letters are not significantly different from each other.

| Trait                                       | Adulthood temperature                        | Population | Developmental temperature | Fecundity (10 days) | Tukey's HSD        | Fecundity (20 days) | Tukey's HSD        |     |
|---------------------------------------------|----------------------------------------------|------------|---------------------------|---------------------|--------------------|---------------------|--------------------|-----|
| Mean cumulative number of eggs per female   | 17°C                                         | India      | 17°C                      | 172.71 $\pm$ 7.95   | A                  | 399.46 $\pm$ 19.21  | A                  |     |
|                                             |                                              |            | 25°C                      | 155.71 $\pm$ 5.79   | A                  | 376.71 $\pm$ 15.40  | A                  |     |
|                                             |                                              |            | 29°C                      | 36.13 $\pm$ 10.62   | B                  | 190.87 $\pm$ 20.35  | B                  |     |
|                                             |                                              | Slovakia   | 17°C                      | 200.92 $\pm$ 10.89  | B                  | 537.13 $\pm$ 28.74  | A                  |     |
|                                             |                                              |            | 25°C                      | 285.14 $\pm$ 18.61  | A                  | 587.82 $\pm$ 41.33  | A                  |     |
|                                             |                                              |            | 29°C                      | 188.17 $\pm$ 12.34  | B                  | 401.67 $\pm$ 29.57  | B                  |     |
|                                             | 25°C                                         | India      | 17°C                      | 548.29 $\pm$ 21.23  | B                  | -                   | -                  |     |
|                                             |                                              |            | 25°C                      | 638.13 $\pm$ 18.68  | A                  | -                   | -                  |     |
|                                             |                                              |            | 29°C                      | 495.58 $\pm$ 22.28  | B                  | -                   | -                  |     |
|                                             |                                              | Slovakia   | 17°C                      | 757.38 $\pm$ 47.07  | A                  | -                   | -                  |     |
|                                             |                                              |            | 25°C                      | 795.86 $\pm$ 44.04  | A                  | -                   | -                  |     |
|                                             |                                              |            | 29°C                      | 683.52 $\pm$ 21.91  | A                  | -                   | -                  |     |
|                                             | 29°C                                         | India      | 17°C                      | 419.50 $\pm$ 32.77  | B                  | -                   | -                  |     |
|                                             |                                              |            | 25°C                      | 660.09 $\pm$ 27.50  | A                  | -                   | -                  |     |
|                                             |                                              |            | 29°C                      | 441.00 $\pm$ 34.37  | B                  | -                   | -                  |     |
|                                             |                                              | Slovakia   | 17°C                      | 717.21 $\pm$ 47.18  | A,B                | -                   | -                  |     |
|                                             |                                              |            | 25°C                      | 856.24 $\pm$ 57.96  | A                  | -                   | -                  |     |
|                                             |                                              |            | 29°C                      | 612.08 $\pm$ 41.00  | B                  | -                   | -                  |     |
|                                             | Mean cumulative number of eggs per body size | 17°C       | India                     | 17°C                | 177.74 $\pm$ 7.96  | A                   | 409.86 $\pm$ 18.12 | A   |
|                                             |                                              |            |                           | 25°C                | 186.77 $\pm$ 7.98  | A                   | 450.82 $\pm$ 19.86 | A   |
|                                             |                                              |            |                           | 29°C                | 48.94 $\pm$ 14.18  | B                   | 255.99 $\pm$ 27.70 | B   |
|                                             |                                              |            | Slovakia                  | 17°C                | 191.61 $\pm$ 11.32 | B                   | 511.09 $\pm$ 29.12 | A,B |
|                                             |                                              |            |                           | 25°C                | 295.17 $\pm$ 17.73 | A                   | 610.21 $\pm$ 41.08 | A   |
|                                             |                                              |            |                           | 29°C                | 210.61 $\pm$ 12.67 | B                   | 450.84 $\pm$ 31.43 | B   |
| 25°C                                        |                                              | India      | 17°C                      | 571.58 $\pm$ 27.89  | B                  | -                   | -                  |     |
|                                             |                                              |            | 25°C                      | 762.89 $\pm$ 26.20  | A                  | -                   | -                  |     |
|                                             |                                              |            | 29°C                      | 655.57 $\pm$ 28.13  | B                  | -                   | -                  |     |
|                                             |                                              | Slovakia   | 17°C                      | 688.18 $\pm$ 44.51  | B                  | -                   | -                  |     |
|                                             |                                              |            | 25°C                      | 857.48 $\pm$ 50.17  | A                  | -                   | -                  |     |
|                                             |                                              |            | 29°C                      | 748.95 $\pm$ 23.35  | A,B                | -                   | -                  |     |
| 29°C                                        |                                              | India      | 17°C                      | 449.47 $\pm$ 32.41  | C                  | -                   | -                  |     |
|                                             |                                              |            | 25°C                      | 761.86 $\pm$ 30.66  | A                  | -                   | -                  |     |
|                                             |                                              |            | 29°C                      | 595.44 $\pm$ 45.70  | B                  | -                   | -                  |     |
|                                             |                                              | Slovakia   | 17°C                      | 660.58 $\pm$ 44.08  | B                  | -                   | -                  |     |
|                                             |                                              |            | 25°C                      | 938.77 $\pm$ 65.33  | A                  | -                   | -                  |     |
|                                             |                                              |            | 29°C                      | 691.74 $\pm$ 48.74  | B                  | -                   | -                  |     |
| Mean cumulative number of eggs per ovariole |                                              | 17°C       | India                     | 17°C                | 5.02 $\pm$ 0.21    | A                   | 11.64 $\pm$ 0.54   | A   |
|                                             |                                              |            |                           | 25°C                | 4.57 $\pm$ 0.19    | A                   | 11.03 $\pm$ 0.45   | A   |
|                                             |                                              |            |                           | 29°C                | 1.14 $\pm$ 0.33    | B                   | 6.07 $\pm$ 0.65    | B   |
|                                             |                                              |            | Slovakia                  | 17°C                | 4.83 $\pm$ 0.28    | B                   | 12.88 $\pm$ 0.70   | A   |
|                                             |                                              |            |                           | 25°C                | 6.14 $\pm$ 0.41    | A                   | 12.64 $\pm$ 0.89   | A   |
|                                             |                                              |            |                           | 29°C                | 4.45 $\pm$ 0.27    | B                   | 9.56 $\pm$ 0.68    | B   |
|                                             | 25°C                                         | India      | 17°C                      | 16.70 $\pm$ 0.70    | B                  | -                   | -                  |     |
|                                             |                                              |            | 25°C                      | 19.10 $\pm$ 0.53    | A                  | -                   | -                  |     |
|                                             |                                              |            | 29°C                      | 15.86 $\pm$ 0.67    | B                  | -                   | -                  |     |
|                                             |                                              | Slovakia   | 17°C                      | 17.24 $\pm$ 1.05    | A                  | -                   | -                  |     |
|                                             |                                              |            | 25°C                      | 16.96 $\pm$ 0.87    | A                  | -                   | -                  |     |
|                                             |                                              |            | 29°C                      | 17.48 $\pm$ 0.79    | A                  | -                   | -                  |     |
|                                             | 29°C                                         | India      | 17°C                      | 12.37 $\pm$ 0.81    | B                  | -                   | -                  |     |
|                                             |                                              |            | 25°C                      | 18.59 $\pm$ 0.67    | A                  | -                   | -                  |     |
|                                             |                                              |            | 29°C                      | 14.72 $\pm$ 1.14    | B                  | -                   | -                  |     |
|                                             |                                              | Slovakia   | 17°C                      | 16.46 $\pm$ 1.04    | A                  | -                   | -                  |     |
|                                             |                                              |            | 25°C                      | 17.89 $\pm$ 1.25    | A                  | -                   | -                  |     |
|                                             |                                              |            | 29°C                      | 14.69 $\pm$ 1.06    | A                  | -                   | -                  |     |

**Table S3.** Two-way analyses of variance (ANOVA) testing the effects of population and developmental temperature, and their interactions on the egg-to-adult viability at a given day at three adulthood temperatures. *df* - degrees of freedom; SSQ - the sum of squares for each source of variation.

| Adulthood temperature | Day  | Source of variation                    | <i>df</i> | SSQ   | <i>F</i> -ratio | <i>P</i> -value |
|-----------------------|------|----------------------------------------|-----------|-------|-----------------|-----------------|
| 17°C                  | 10th | Population                             | 1         | 0.80  | 17.57           | < 0.0001        |
|                       |      | Developmental temperature              | 2         | 3.32  | 36.54           | < 0.0001        |
|                       |      | Population × Developmental temperature | 2         | 1.57  | 17.27           | < 0.0001        |
|                       |      | Error                                  | 123       | 5.58  | -               | -               |
|                       | 20th | Population                             | 1         | 0.13  | 2.08            | 0.152           |
|                       |      | Developmental temperature              | 2         | 1.17  | 9.22            | 0.0002          |
|                       |      | Population × Developmental temperature | 2         | 0.02  | 0.15            | 0.863           |
|                       |      | Error                                  | 125       | 7.95  | -               | -               |
| 25°C                  | 5th  | Population                             | 1         | 0.06  | 0.88            | 0.351           |
|                       |      | Developmental temperature              | 2         | 1.08  | 7.95            | 0.0005          |
|                       |      | Population × Developmental temperature | 2         | 1.29  | 9.54            | 0.0001          |
|                       |      | Error                                  | 132       | 8.94  | -               | -               |
|                       | 10th | Population                             | 1         | 0.01  | 0.05            | 0.824           |
|                       |      | Developmental temperature              | 2         | 0.46  | 2.19            | 0.116           |
|                       |      | Population × Developmental temperature | 2         | 0.26  | 1.23            | 0.297           |
|                       |      | Error                                  | 122       | 12.71 | -               | -               |
| 29°C                  | 5th  | Population                             | 1         | 0.04  | 0.69            | 0.407           |
|                       |      | Developmental temperature              | 2         | 5.26  | 44.96           | < 0.0001        |
|                       |      | Population × Developmental temperature | 2         | 2.47  | 21.13           | < 0.0001        |
|                       |      | Error                                  | 131       | 7.66  | -               | -               |
|                       | 10th | Population                             | 1         | 0.01  | 0.10            | 0.752           |
|                       |      | Developmental temperature              | 2         | 1.73  | 14.43           | < 0.0001        |
|                       |      | Population × Developmental temperature | 2         | 0.80  | 6.72            | 0.002           |
|                       |      | Error                                  | 122       | 7.30  | -               | -               |



**Table S4.** The analyses of early fecundity by ANCOVA with developmental temperature as the fixed factor and thorax length or ovariole number as the covariate. *df* - degrees of freedom; SSQ - the sum of squares for each source of variation.

| Adulthood temperature        | Population | Source of variation       | <i>df</i> | SSQ       | <i>F</i> -ratio | <i>P</i> -value | Source of variation       | <i>df</i> | SSQ       | <i>F</i> -ratio | <i>P</i> -value |
|------------------------------|------------|---------------------------|-----------|-----------|-----------------|-----------------|---------------------------|-----------|-----------|-----------------|-----------------|
| <b>17°C</b><br>(ten days)    | India      | Developmental temperature | 2         | 144236.1  | 43.78           | < 0.0001        | Developmental temperature | 2         | 202903.0  | 63.67           | < 0.0001        |
|                              |            | Thorax length             | 1         | 84.8      | 0.05            | 0.821           | Ovariole number           | 1         | 3701.8    | 2.32            | 0.132           |
|                              |            | Error                     | 67        | 110373.7  | -               | -               | Error                     | 67        | 106756.8  | -               | -               |
|                              | Slovakia   | Developmental temperature | 2         | 129797.0  | 14.75           | < 0.0001        | Developmental temperature | 2         | 80823.1   | 8.86            | 0.001           |
|                              |            | Thorax length             | 1         | 19122.7   | 4.35            | 0.041           | Ovariole number           | 1         | 8504.8    | 1.86            | 0.177           |
|                              |            | Error                     | 66        | 290467.0  | -               | -               | Error                     | 66        | 301084.9  | -               | -               |
| <b>17°C</b><br>(twenty days) | India      | Developmental temperature | 2         | 285209.8  | 17.98           | < 0.0001        | Developmental temperature | 2         | 480781.2  | 30.05           | < 0.0001        |
|                              |            | Thorax length             | 1         | 12767.6   | 1.61            | 0.209           | Ovariole number           | 1         | 8209.9    | 1.03            | 0.315           |
|                              |            | Error                     | 67        | 531437.9  | -               | -               | Error                     | 67        | 535995.7  | -               | -               |
|                              | Slovakia   | Developmental temperature | 2         | 276800.2  | 5.46            | 0.006           | Developmental temperature | 2         | 335898.7  | 6.57            | 0.003           |
|                              |            | Thorax length             | 1         | 55693.6   | 2.20            | 0.143           | Ovariole number           | 1         | 39619.3   | 1.55            | 0.218           |
|                              |            | Error                     | 66        | 1671743.6 | -               | -               | Error                     | 66        | 1687818.0 | -               | -               |
| <b>25°C</b><br>(ten days)    | India      | Developmental temperature | 2         | 230188.9  | 11.03           | < 0.0001        | Developmental temperature | 2         | 179228.4  | 8.90            | 0.001           |
|                              |            | Thorax length             | 1         | 335.6     | 0.03            | 0.858           | Ovariole number           | 1         | 24793.1   | 2.46            | 0.121           |
|                              |            | Error                     | 67        | 699185.8  | -               | -               | Error                     | 67        | 674728.3  | -               | -               |
|                              | Slovakia   | Developmental temperature | 2         | 161404.1  | 2.21            | 0.118           | Developmental temperature | 2         | 17287.9   | 0.26            | 0.774           |
|                              |            | Thorax length             | 1         | 22225.4   | 0.61            | 0.438           | Ovariole number           | 1         | 154777.6  | 4.62            | 0.036           |
|                              |            | Error                     | 63        | 2298348.0 | -               | -               | Error                     | 62        | 2078819.8 | -               | -               |
| <b>29°C</b><br>(ten days)    | India      | Developmental temperature | 2         | 847360.5  | 19.78           | < 0.0001        | Developmental temperature | 2         | 505740.1  | 11.90           | < 0.0001        |
|                              |            | Thorax length             | 1         | 159193.2  | 7.43            | 0.008           | Ovariole number           | 1         | 170993.6  | 8.05            | 0.006           |
|                              |            | Error                     | 66        | 1413944.6 | -               | -               | Error                     | 66        | 1402144.2 | -               | -               |
|                              | Slovakia   | Developmental temperature | 2         | 686391.7  | 6.36            | 0.003           | Developmental temperature | 2         | 393642.1  | 3.62            | 0.032           |
|                              |            | Thorax length             | 1         | 62008.8   | 1.15            | 0.288           | Ovariole number           | 1         | 37056.2   | 0.68            | 0.412           |
|                              |            | Error                     | 65        | 3505512.8 | -               | -               | Error                     | 65        | 3530465.4 | -               | -               |

**Table S5.** Mean cumulative number of eggs ( $\pm$  s.e.m) laid by individual females during a given period at three adulthood temperatures adjusted either for thorax length or ovariole number. Adjusted values were compared by Tukey's HSD test ( $\alpha = 0.05$ ). Groups with the same letters are not significantly different from each other.

| Adulthood temperature | Population | Developmental temperature | Adjusted for thorax length |             |                     |             | Adjusted for ovariole number |             |                     |             |
|-----------------------|------------|---------------------------|----------------------------|-------------|---------------------|-------------|------------------------------|-------------|---------------------|-------------|
|                       |            |                           | Fecundity (10 days)        | Tukey's HSD | Fecundity (20 days) | Tukey's HSD | Fecundity (10 days)          | Tukey's HSD | Fecundity (20 days) | Tukey's HSD |
| 17°C                  | India      | 17°C                      | 171.17 $\pm$ 10.70         | A           | 380.61 $\pm$ 23.48  | A           | 170.57 $\pm$ 8.27            | A           | 396.28 $\pm$ 18.53  | A           |
|                       |            | 25°C                      | 155.87 $\pm$ 8.32          | A           | 378.70 $\pm$ 18.25  | A           | 153.88 $\pm$ 8.24            | A           | 373.99 $\pm$ 18.45  | A           |
|                       |            | 29°C                      | 37.56 $\pm$ 10.56          | B           | 208.46 $\pm$ 23.17  | B           | 40.26 $\pm$ 8.75             | B           | 197.03 $\pm$ 19.62  | B           |
|                       | Slovakia   | 17°C                      | 184.61 $\pm$ 15.64         | B           | 509.29 $\pm$ 37.52  | A,B         | 204.57 $\pm$ 14.04           | B           | 545.01 $\pm$ 33.25  | A           |
|                       |            | 25°C                      | 286.28 $\pm$ 14.15         | A           | 589.77 $\pm$ 33.96  | A           | 277.58 $\pm$ 15.43           | A           | 571.51 $\pm$ 36.53  | A           |
|                       |            | 29°C                      | 203.43 $\pm$ 15.39         | B           | 427.71 $\pm$ 36.93  | B           | 191.44 $\pm$ 13.99           | B           | 408.73 $\pm$ 33.13  | B           |
| 25°C                  | India      | 17°C                      | 545.14 $\pm$ 27.29         | B           | -                   | -           | 544.61 $\pm$ 20.62           | B           | -                   | -           |
|                       |            | 25°C                      | 638.47 $\pm$ 21.39         | A           | -                   | -           | 631.82 $\pm$ 21.31           | A           | -                   | -           |
|                       |            | 29°C                      | 498.41 $\pm$ 26.15         | B           | -                   | -           | 505.31 $\pm$ 21.40           | B           | -                   | -           |
|                       | Slovakia   | 17°C                      | 784.88 $\pm$ 52.55         | A           | -                   | -           | 750.40 $\pm$ 37.52           | A           | -                   | -           |
|                       |            | 25°C                      | 783.01 $\pm$ 43.93         | A           | -                   | -           | 757.73 $\pm$ 41.54           | A           | -                   | -           |
|                       |            | 29°C                      | 665.57 $\pm$ 47.61         | A           | -                   | -           | 715.91 $\pm$ 42.71           | A           | -                   | -           |
| 29°C                  | India      | 17°C                      | 372.47 $\pm$ 34.50         | B           | -                   | -           | 413.71 $\pm$ 29.82           | B           | -                   | -           |
|                       |            | 25°C                      | 646.53 $\pm$ 30.92         | A           | -                   | -           | 626.27 $\pm$ 32.64           | A           | -                   | -           |
|                       |            | 29°C                      | 503.63 $\pm$ 38.20         | B           | -                   | -           | 480.87 $\pm$ 33.48           | B           | -                   | -           |
|                       | Slovakia   | 17°C                      | 673.56 $\pm$ 62.48         | A,B         | -                   | -           | 722.26 $\pm$ 47.96           | A,B         | -                   | -           |
|                       |            | 25°C                      | 874.81 $\pm$ 53.55         | A           | -                   | -           | 836.87 $\pm$ 56.00           | A           | -                   | -           |
|                       |            | 29°C                      | 639.48 $\pm$ 53.85         | B           | -                   | -           | 623.98 $\pm$ 49.71           | B           | -                   | -           |
